# Supplementary material for: Use of Drug Claims Data and a Medication Risk Score to Assess the Impact of CYP2D6 Drug Interactions among Opioid Users on Healthcare Costs
Source: MDPI journal article supplement (doi:10.3390/jpm11111174), 2021-11-10
Supplement: s1 [file s1]

## Supplementary Materials

**Table S1.** Detailed CYP2D6 co-medications among CYP2D6 opioid users.

| <b>CYP2D6 OPIOID AND CYP2D6 CO-MEDICATIONS<br/>(<i>n</i> = 577)</b> | <b><i>n</i></b> | <b>FREQUENCY %</b> |
|---------------------------------------------------------------------|-----------------|--------------------|
| <b>CYP2D6 INHIBITORS</b>                                            | 13              | 2.3%               |
| ORPHENADRINE                                                        | 6               | 1%                 |
| TERBINAFINE                                                         | 4               | 0.7%               |
| AMIODARONE                                                          | 3               | 0.5%               |
| <b>CYP2D6 SUBSTRATE-MBI *</b>                                       | 39              | 6.7%               |
| PAROXETINE                                                          | 36              | 6.2%               |
| MIRABEGRON                                                          | 3               | 0.5%               |
| <b>CYP2D6 SUBSTRATES WITH STRONG OR<br/>INTERMEDIATE AFFINITY</b>   | 454             | 78.7%              |
| BUPROPION                                                           | 108             | 18.7%              |
| FLUOXETINE                                                          | 89              | 15.4%              |
| ARIPIRAZOLE                                                         | 13              | 2.3%               |
| FLECAINIDE                                                          | 2               | 0.3%               |
| FLUVOXAMINE                                                         | 1               | 0.2%               |
| DULOXETINE                                                          | 124             | 21.5%              |
| CARVEDILOL                                                          | 36              | 6.2%               |
| PROPRANOLOL                                                         | 25              | 4.3%               |
| ESCITALOPRAM                                                        | 15              | 2.6%               |
| METOCLOPRAMIDE                                                      | 12              | 2.1%               |
| CITALOPRAM                                                          | 9               | 1.6%               |
| HYDROXYZINE                                                         | 9               | 1.6%               |
| DOXEPIN                                                             | 4               | 0.7%               |
| RISPERIDONE                                                         | 3               | 0.5%               |
| HALOPERIDOL                                                         | 2               | 0.3%               |
| LORATADINE                                                          | 1               | 0.2%               |
| TAMOXIFEN                                                           | 1               | 0.2%               |

\*MBI; mechanism-based inhibitor.

**Table S2.** The top 25 prescribed medications in the overall study population.

| NO-OPIOID GROUP     |                        | OPIOID GROUP*       |                        |
|---------------------|------------------------|---------------------|------------------------|
| MEDICATION NAME     | NUMBER OF PATIENTS (%) | MEDICATION NAME     | NUMBER OF PATIENTS (%) |
| ETHINYLESTRADIOL    | 5217 (11.2%)           | ACETAMINOPHEN       | 2449 (59.9%)           |
| LISINOPRIL          | 4383 (9.4%)            | AMOXICILLIN         | 364 (8.9%)             |
| HYDROCHLOROTHIAZIDE | 4381 (9.4%)            | HYDROCHLOROTHIAZIDE | 360 (8.8%)             |
| ATORVASTATIN        | 3917 (8.4%)            | LISINOPRIL          | 349 (8.5%)             |
| THYROXINE           | 3753 (8.0%)            | GABAPENTIN          | 342 (8.4%)             |
| AMOXICILLIN         | 3145 (6.7%)            | ATORVASTATIN        | 305 (7.5%)             |
| METFORMIN           | 2562 (5.5%)            | GUAIFENESIN         | 304 (7.4%)             |
| OMEPRAZOLE          | 2341 (5.0%)            | IBUPROFEN           | 291 (7.1%)             |
| ALBUTEROL           | 2192 (4.7%)            | OMEPRAZOLE          | 259 (6.3%)             |
| LOSARTAN            | 2109 (4.5%)            | THYROXINE           | 256 (6.3%)             |
| FLUTICASONE         | 2053 (4.4%)            | CYCLOBENZAPRINE     | 248 (6.1%)             |
| METOPROLOL          | 2035 (4.4%)            | AZITHROMYCIN        | 198 (4.8%)             |
| AMLODIPINE          | 2019 (4.3%)            | METFORMIN           | 196 (4.8%)             |
| NORETHINDRONE       | 1957 (4.2%)            | ALBUTEROL           | 195 (4.8%)             |
| SIMVASTATIN         | 1896 (4.1%)            | METOPROLOL          | 190 (4.6%)             |
| SERTRALINE          | 1887 (4.0%)            | PREDNISONE          | 185 (4.5%)             |
| AZITHROMYCIN        | 1629 (3.5%)            | AMLODIPINE          | 182 (4.5%)             |
| NORGESTIMATE        | 1366 (2.9%)            | ZOLPIDEM            | 169 (4.1%)             |
| BUPROPION           | 1306 (2.8%)            | LOSARTAN            | 158 (3.9%)             |
| ESCITALOPRAM        | 1280 (2.7%)            | MELOXICAM           | 157 (3.8%)             |
| CLAVULANIC ACID     | 1257 (2.7%)            | PANTOPRAZOLE        | 150 (3.7%)             |
| FLUOXETINE          | 1178 (2.5%)            | ALPRAZOLAM          | 148 (3.6%)             |
| MONTELUKAST         | 1146 (2.5%)            | SERTRALINE          | 143 (3.5%)             |
| PANTOPRAZOLE        | 1131 (2.4%)            | FLUTICASONE         | 138 (3.4%)             |
| DEXTROAMPHETAMINE   | 1112 (2.4%)            | SIMVASTATIN         | 138 (3.4%)             |

\*excluding opioid medications.

**Table S3.** The top 25 concomitant medications in patients receiving CYP2D6 opioids without and with CYP2D6 interacting co-medications.

| CYP2D6-ACTIVATED OPIOID_NO<br>INTERACTION |                           | CYP2D6-ACTIVATED OPIOID_WITH<br>CYP2D6 INTERACTING DRUGS |                           |
|-------------------------------------------|---------------------------|----------------------------------------------------------|---------------------------|
| MEDICATION NAME                           | NUMBER OF<br>PATIENTS (%) | MEDICATION NAME                                          | NUMBER OF<br>PATIENTS (%) |
| ACETAMINOPHEN                             | 2094 (63.5%)              | ACETAMINOPHEN                                            | 353 (61.2%)               |
| AMOXICILLIN                               | 326 (9.9%)                | METOPROLOL                                               | 181 (31.4%)               |
| GUAIFENESIN                               | 285 (8.6%)                | DULOXETINE                                               | 124 (21.5%)               |
| IBUPROFEN                                 | 258 (7.8%)                | BUPROPION                                                | 108 (18.7%)               |
| HYDROCHLOROTHIAZIDE                       | 252 (7.6%)                | GABAPENTIN                                               | 104 (18.0%)               |
| LISINOPRIL                                | 235 (7.1%)                | ATORVASTATIN                                             | 103 (17.9%)               |
| GABAPENTIN                                | 204 (6.2%)                | LISINOPRIL                                               | 101 (17.5%)               |
| CYCLOBENZAPRINE                           | 190 (5.8%)                | HYDROCHLOROTHIAZIDE                                      | 95 (16.5%)                |
| ATORVASTATIN                              | 188 (5.7%)                | FLUOXETINE                                               | 89 (15.4%)                |
| AZITHROMYCIN                              | 180 (5.5%)                | OMEPRAZOLE                                               | 79 (13.7%)                |
| THYROXINE                                 | 175 (5.3%)                | THYROXINE                                                | 67 (11.6%)                |
| OMEPRAZOLE                                | 168 (5.1%)                | AMLODIPINE                                               | 63 (10.9%)                |
| ALBUTEROL                                 | 159 (4.8%)                | METFORMIN                                                | 61 (10.6%)                |
| PREDNISONE                                | 148 (4.5%)                | PANTOPRAZOLE                                             | 58 (10.1%)                |
| METFORMIN                                 | 123 (3.7%)                | CYCLOBENZAPRINE                                          | 49 (8.5%)                 |
| MELOXICAM                                 | 122 (3.7%)                | SIMVASTATIN                                              | 44 (7.6%)                 |
| ZOLPIDEM                                  | 120 (3.6%)                | LOSARTAN                                                 | 44 (7.6%)                 |
| ONDANSETRON                               | 116 (3.5%)                | FLUTICASONE                                              | 38 (6.6%)                 |
| PROMETHAZINE                              | 110 (3.3%)                | ZOLPIDEM                                                 | 37 (6.4%)                 |
| AMLODIPINE                                | 109 (3.3%)                | PAROXETINE                                               | 36 (6.2%)                 |
| ETHINYLESTRADIOL                          | 109 (3.3%)                | CARVEDILOL                                               | 36 (6.2%)                 |
| LOSARTAN                                  | 109 (3.3%)                | AMOXICILLIN                                              | 34 (5.9%)                 |
| SERTRALINE                                | 104 (3.2%)                | PREDNISONE                                               | 34 (5.9%)                 |
| CLAVULANIC ACID                           | 100 (3.0%)                | TRAZODONE                                                | 33 (5.7%)                 |
| ALPRAZOLAM                                | 98 (3.0%)                 | MORPHINE                                                 | 33 (5.7%)                 |
